# Supplementary material for: Mesoporous SiC-Based Photocatalytic Membranes and Coatings for Water Treatment
Source: MDPI journal article supplement (doi:10.3390/membranes13070672), 2023-07-16
Supplement: s1 [file s1]

Supplementary Information

# Mesoporous SiC-based photocatalytic membranes and coatings for water treatment

Karla Begonia Cervantes-Diaz, Martin Drobek, Anne Julbe, André Ayral and Julien Cambedouzou \*

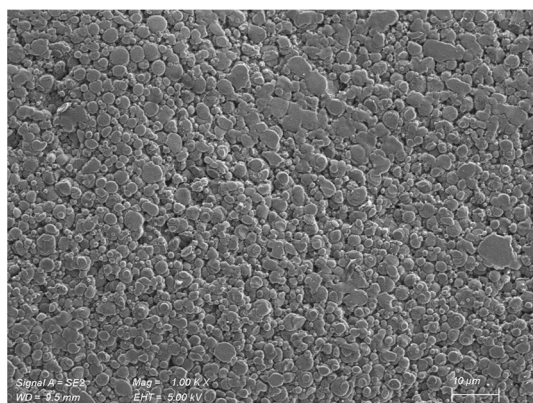

S1. SEM image of the equivalent SiC powder.

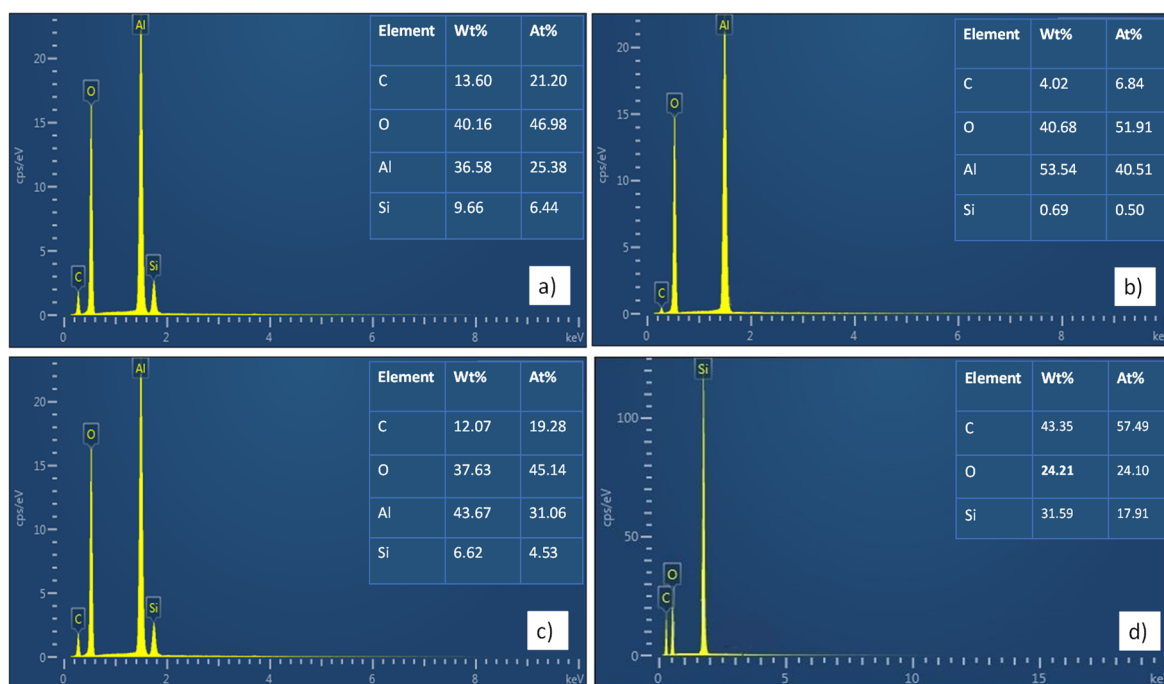

S2. EDX analysis for the SiC membrane (a) top surface, (b) central zone, (c) bottom part of the membrane cross-section. The EDX spectra of the equivalent SiC powder is reported in (d) for comparison.

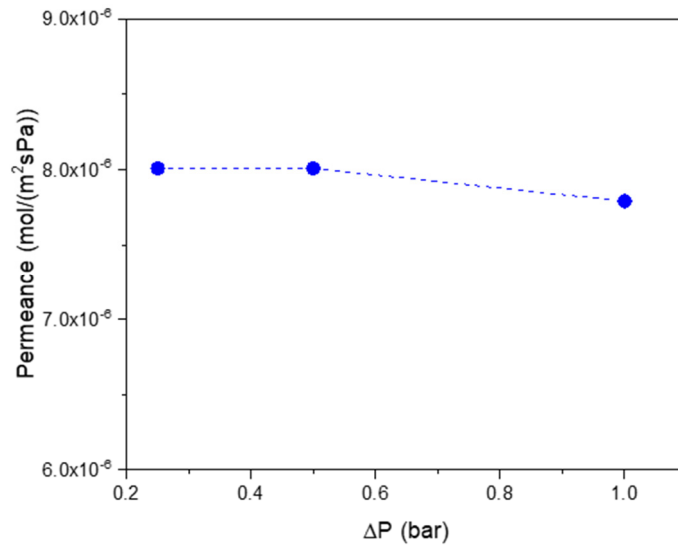

**S3.** N<sub>2</sub> permeance for SiC-based composite membrane as a function of the applied transmembrane pressure.

**S4.** Details on Kubelka-Munk equation used for bandgap calculation.

The band gap energy was determined with the Kubelka-Munk function  $F(R)$ , where the reflectance data can be converted to an absorption coefficient as shown in eq. 1:

$$F(R) = \frac{K}{S} = \frac{(1-R)^2}{2R} \quad (1)$$

with  $R$  the reflectance,  $K$  the absorption coefficient and  $S$  the scattering coefficient. Kubelka-Munk function could be substituted by the absorption coefficient  $\alpha$  as in eq. 2 [42,43]:

$$K = 2\alpha = SF(R) \quad (2)$$

Then, from Tauc equation (eq. 3):

$$(\alpha h\nu)^{1/n} = A(h\nu - E_g) \quad (3)$$

with  $h$  the Plank constant,  $\nu$  the photon frequency,  $A$  a proportional constant,  $E_g$  the bandgap energy and  $n$  determine the transition nature with values of  $n=1/2$  for direct allowed transition,  $n=3/2$  for direct forbidden transition,  $n=2$  for indirect allowed transition, and  $n=3$  for indirect forbidden transition.

Substituting  $F(R)$  instead of  $\alpha$  gives (eq. 4):

$$(F(R)h\nu)^{1/n} = A'(h\nu - E_g) \quad (4)$$

with  $A' = \frac{2A}{S}$  a constant [45]. Then, the bandgap is calculated by plotting  $(F(R)h\nu)^{1/n}$  as a function of the photon energy  $h\nu$  and from the intersection with the  $x$ -axis of the linear fit of the region associated with the optical absorption edge [42–44].

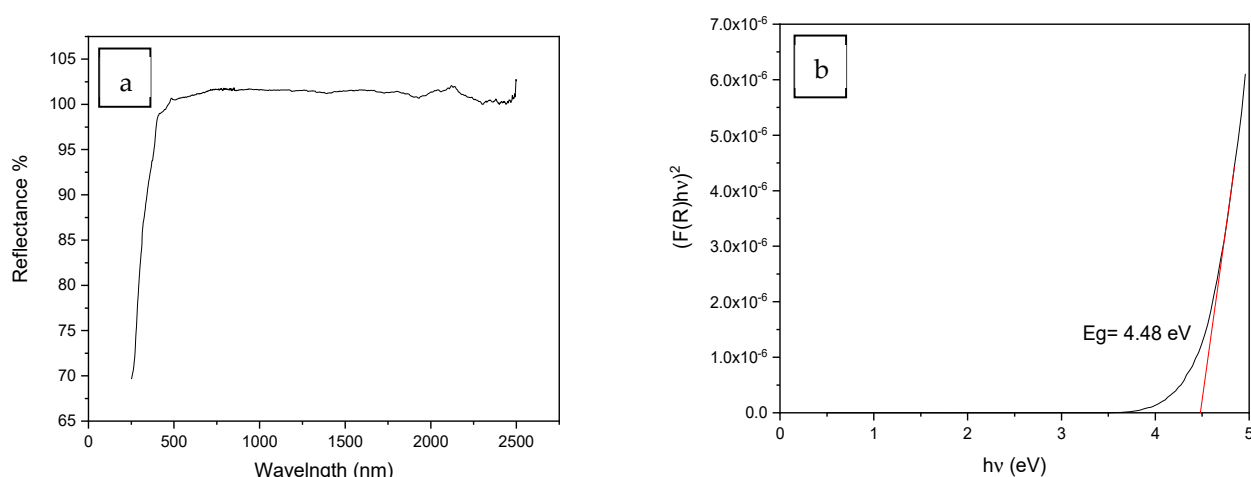

S5. (a) Reflectance spectrum and (b) calculated bandgap for the pristine  $\alpha$ - $\text{Al}_2\text{O}_3$  support.

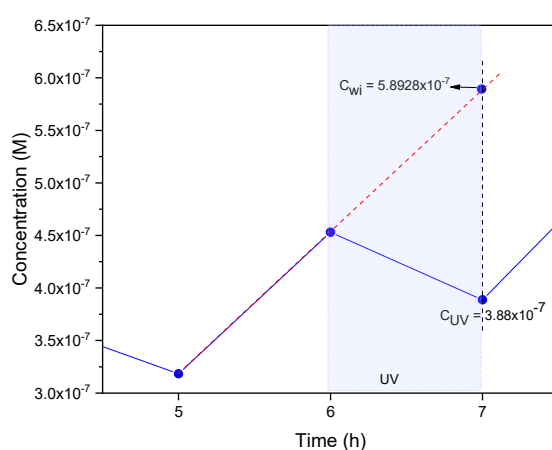

S6. Example of graphical representation used to determine the concentration values for the calculation of the specific degradation rate  $\delta$ .

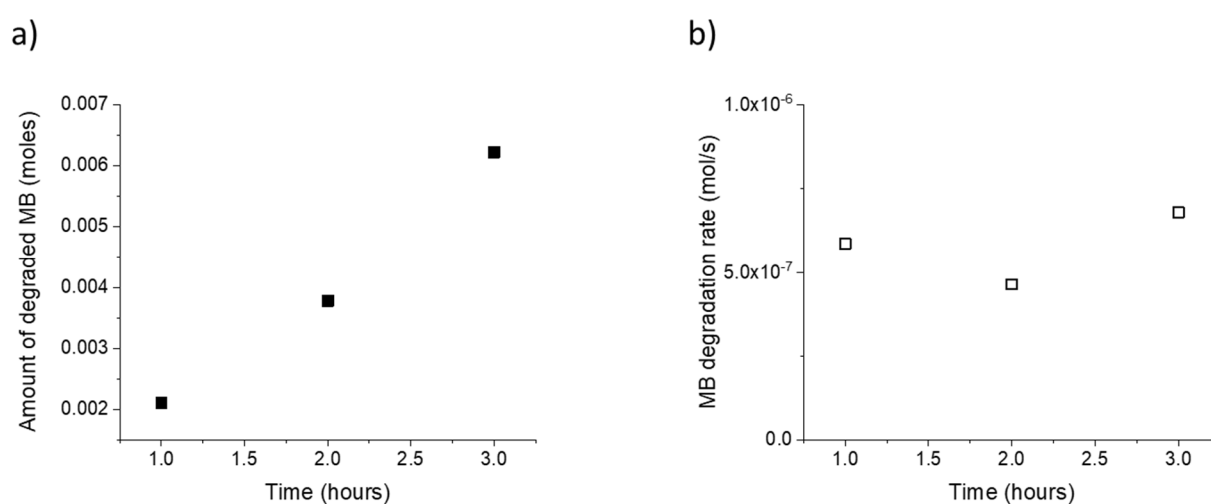

S7. (a) Cumulative amount of degraded MB and (b) MB abatement rate during photocatalytic experiments in batch mode.
